# **The *NDEI* genomic locus can affect treatment of psychiatric illness through gene expression changes related to MicroRNA-484**

Nicholas J. Bradshaw<sup>1,2</sup>, Liisa Ukkola-Vuoti<sup>3,4,5</sup>, Maiju Pankakoski<sup>3</sup>, Amanda B. Zheutlin<sup>6</sup>, Alfredo Ortega-Alonso<sup>3,4</sup>, Minna Torniaainen-Holm<sup>3,4</sup>, Vishal Sinha<sup>3,4,5</sup>, Sebastian Therman<sup>3</sup>, Tiina Paunio<sup>7,8</sup>, Jaana Suvisaari<sup>3</sup>, Jouko Lönnqvist<sup>3,7</sup>, Tyrone D. Cannon<sup>6</sup>, Jari Haukka<sup>3,9</sup>, William Hennah<sup>3,4,5\*</sup>

<sup>1</sup>Department of Neuropathology, Heinrich Heine University, 40225 Düsseldorf, Germany

<sup>2</sup>Department of Biotechnology, University of Rijeka, 51000 Rijeka, Croatia

<sup>3</sup>Department of Health, Mental Health Unit, National Institute for Health and Welfare, 00271 Helsinki, Finland

<sup>4</sup>Institute for Molecular Medicine Finland FIMM, University of Helsinki, 00014 Helsinki, Finland

<sup>5</sup>Medicum, University of Helsinki, 00014 Helsinki, Finland

<sup>6</sup>Department of Psychology, Yale University, New Haven, CT 06520, USA

<sup>7</sup>Department of Psychiatry, University of Helsinki and Helsinki University Hospital, 00014 Helsinki, Finland

<sup>8</sup>Department of Health, Genomics and Biomarkers Unit, National Institute for Health and Welfare, 00271 Helsinki, Finland

<sup>9</sup>Department of Public Health, Clinicum, University of Helsinki, 00014 Helsinki, Finland

\*Corresponding Author:

William Hennah PhD

Institute for Molecular Medicine Finland FIMM, P.O. Box 20, FI-00014 University of Helsinki, Finland

Email: [william.hennah@helsinki.fi](mailto:william.hennah@helsinki.fi)

# Abstract

Genetic studies of familial schizophrenia in Finland have observed significant associations with a group of biologically related genes, *DISC1*, *NDE1*, *NDEI1*, *PDE4B* and *PDE4D*, the “DISC1 network”. Here, we utilize gene expression and psychoactive medication use data to study their biological consequences and potential treatment implications. Gene expression levels were determined in 64 individuals from 18 families, whilst prescription medication information has been collected over a ten-year period for 931 affected individuals. We demonstrate that the *NDE1* SNP rs2242549 associates with significant changes in gene expression for 2,908 probes (2,542 genes), of which 794 probes (719 genes) were replicable. A significant number of the genes altered were predicted targets of microRNA-484 ( $p=3.0\times10^{-8}$ ), located on a non-coding exon of *NDE1*. Variants within the *NDE1* locus also displayed significant genotype by gender interaction to early cessation of psychoactive medications metabolized by CYP2C19. Furthermore, we demonstrate that miR-484 can affect the expression of *CYP2C19* in a cell culture system. Thus, variation at the *NDE1* locus may alter risk of mental illness, in part through modification of miR-484, and such modification alters treatment response to specific psychoactive medications, leading to the potential for use of this locus in targeting treatment.

**Keywords:** schizophrenia, gene expression, DISC1 network, NDE1, miR-484, pharmacogenetics

# Introduction

The identification of genes that predispose to complex psychiatric traits is an important aspect in studying these conditions, however it is vital that this information is then used to improve our biological understanding and ultimately the treatment procedures for the disorders. This can be achieved through genetic studies in which, instead of using an end state diagnosis, alternative traits are employed that can measure a biological or pharmacological aspect of the condition.

Polygenic disorders, such as schizophrenia, are influenced by numerous interacting genetic factors, therefore identification of one candidate gene may aid in identification of others. This approach has been used in a large Finnish family cohort, in which *DISC1* (Disrupted in Schizophrenia 1) was previously associated with schizophrenia (1, 2), and which led to observation of association with four other genes (*NDE1*, *NDEL1*, *PDE4B*, and *PDE4D*) (3, 4) that encode protein binding partners of the DISC1 protein (5-8). The idea that such protein interaction partners of DISC1 are encoded for by genes which show genetic interaction in mental illness is termed the DISC1 network hypothesis. Specifically, multiple associations for psychiatric (2, 9-11) and related endophenotypes, including memory (12), cognitive, and neuroimaging (13) phenotypes, have been reported for *DISC1* in Finnish cohorts. By conditioning genome-wide linkage data for schizophrenia on *DISC1*, a peak of linkage at chromosome 16p was observed (3), near to *NDE1* (Nuclear Distribution Element 1). This was followed up through association analysis at the *NDE1* locus, leading to the observation that a haplotype and its constituent SNPs associate with schizophrenia in this cohort, in a gender dependent manner (3). Genetic association for schizophrenia was therefore tested for other DISC1 binding partners in this family cohort (4). Although SNPs and haplotypes from six other genes were initially observed to associate, only variants in *NDEL1* (NDE-like 1, a close paralogue of *NDE1*) and in the phosphodiesterases *PDE4B* and *PDE4D* replicated when tested in a second, distinct sample from the cohort (4). Recently, through further investigation of the roles of these variants in the DISC1 network,

the *NDE1* locus has been identified to increase risk to schizophrenia in this Finnish family cohort through interaction with high birth weight, a promising proxy measure for multiple pre- and/or perinatal environments (14).

The role of the DISC1 network as a source for genetic risk for neuropsychiatric disorders is controversial due to the absence, to date, of evidence for their involvement in population based genomic studies of common variation (15, 16). However, these genes have been implicated at least within specific populations through strong evidence emerging from family based approaches and the studies of rare variants. In addition to the evidence from the Finnish family cohort, the *DISC1* and *PDE4B* genes are disrupted by chromosomal aberrations in Scottish families with major mental illness (8, 17, 18). Furthermore, *NDE1* is independently implicated in major mental illness through its presence at 16p13.11, which is subject to duplications in schizophrenia (19-22), as well as being directly implicated through rare SNPs in patients (23). The importance of the NDE1 protein for neurodevelopment more generally has been dramatically demonstrated in individuals with biallelic loss of the functional *NDE1* gene, leading to severe microcephaly phenotypes, sometimes described in conjunction with lissencephaly or hydrocephaly (24-27). Deletion of only one copy of the 16p13.11 locus, meanwhile, has been associated with neurological conditions including autism and epilepsy (28). Recently it has been shown that expression of mature miR-484, a microRNA that is encoded on an untranslated exon of *NDE1*, led to alterations in neural progenitor proliferation and differentiation, as well as behavioural changes in mice, thus implicating the microRNA in the phenotypes associated with 16p13.11 duplication (29).

We have previously studied the effect of DISC1 network genetic variation on gene expression in a publicly available population cohort of the CEU (Utah residents with North and Western European ancestry) individuals, with 528 genes being differentially expressed across 24 variants studied, of

96 which 35 genes had pre-existing supporting evidence for a role in psychosis (30). Intriguingly, seven  
 97 of these affected genes were noted to be targets for drugs prescribed for psychiatric illness, leading  
 98 to the hypothesis that these DISC1 network variants, through their action on gene expression, may  
 99 alter treatment outcome for medications designed to target these genes (30).

100

101 Here, in order to advance our understanding of the role these genes play in the aetiology of  
 102 schizophrenia in Finland, we take this approach further. This is accomplished by utilizing data on  
 103 gene expression levels in case families in which these DISC1 network genetic variants have been  
 104 previously demonstrated to associate with schizophrenia (1-4), as well as by using data collected on  
 105 how different psychoactive medications are used by the affected individuals within these families.

## 106 **Methods**

### 107 *Study Samples*

108 The principal samples used here are part of a larger study of familial schizophrenia. These are Finnish  
 109 patients born between 1940 and 1976, who were identified through the hospital discharge, disability  
 110 pension, and the free medication registers (1, 31). The cohort totals 458 families (498 nuclear  
 111 families) that contain 2,756 individuals, of whom 2,059 have been previously genotyped for the  
 112 DISC1 network genes (1-4). Of these genotyped individuals, 931 are classified as affected with major  
 113 mental illnesses using criteria from the Diagnostic and Statistical Manual of Mental Disorders, fourth  
 114 edition (DSM-IV) (32). These include 635 diagnosed with schizophrenia, 125 with schizoaffective  
 115 disorder, 95 with schizophrenia spectrum diagnoses, and 76 with other mental illness including  
 116 bipolar disorder and major depression. Here, two sub-sets of this familial sample were used as a  
 117 discovery cohort (18 families, N=64) to study gene expression level changes, and all affected  
 118 individuals were used as a discovery cohort (N=931) to study medication use.

119

120 In order to replicate the gene expression results obtained from this family data, two independent  
 121 cohorts were used. The first of these replication cohorts was a Finnish discordant twin pair sample  
 122 ascertained for schizophrenia (N=73), for which information about recruitment and clinical  
 123 evaluation has been described previously (33). Briefly, the participants are 18 schizophrenia patients,  
 124 their 18 unaffected co-twins, and 37 control twins who have provided blood samples for gene  
 125 expression analysis (N=73). The second replication cohort was the Genotype-Tissue Expression  
 126 (GTEx) database (N=338), a publicly available resource for exploring the correlation between  
 127 genotypes and gene expression across multiple tissues and in a genome-wide manner (accessed on  
 128 September 2<sup>nd</sup> 2016, [www.gtexportal.org/home](http://www.gtexportal.org/home)) (34). To best match the source of the RNA used in  
 129 the discovery cohort studies, data from whole blood was used for the GTEx tests.

130

## 131 *Gene Expression Data*

132 Total RNA was extracted from fresh blood samples from 82 individuals, with 18 individuals excluded  
 133 from further analysis as their samples RNA Integrity Number (RIN) were lower than 8. These  
 134 individuals are from 18 families that were re-approached to provide RNA for gene expression analysis  
 135 based on prior genetic observations in these families including *DISC1* (1), *RELN* (35) and *TOP3B*  
 136 (36). Genome-wide gene expression measures were assayed for this discovery cohort using Illumina  
 137 HumanHT-12 v4.0 Expression BeadChip. Of the 48,212 probes on the chip, 11,976 were significantly  
 138 detectable at a threshold of  $p \leq 0.01$  in more than 90% of individuals. The expression data for these  
 139 probes were processed using quantile normalization followed by  $\log_2$  transformation. Raw  
 140 anonymous data regarding this family cohort can be accessed at the Gene Expression Omnibus (GEO)  
 141 database (GSE48072). For the replication twin cohort (N=73), genome-wide gene expression data  
 142 has been measured using Illumina Human WG6 v3.0 chip, as reported previously in detail (37). After  
 143 quality control and data processing, identical to that used on the family data, 18,559 probes from this  
 144 chip were significantly detectable.

145

## 146 *Genotyping*

147 In the discovery sub-cohorts used here, both genotype and expression data was available from 39  
 148 individuals, while 931 individuals had both genotype and medication data available. Thus, in order  
 149 to ensure sufficient numbers of individuals for statistical testing, we only studied genetic variants that  
 150 met specific minor allele homozygote frequencies in these sub-cohorts. In the discovery cohort for  
 151 gene expression, a cut-off value for the minor allele homozygote frequency of  $\geq 10\%$  was  
 152 implemented, providing five variants (*DISC1*: HEP3 haplotype [comprising SNPs rs751229 and  
 153 rs3738401] and rs821616; *NDE1*: rs4781678, rs2242549, and rs1050162) with which to perform the  
 154 analysis. For the discovery cohort for medication use, the frequency of the genetic variants was  
 155 restricted to those with a minor allele homozygote frequency of at least 5%. This allowed seven

156 variants from three DISC1 network genes to be studied (*DISC1*: rs821616; *NDE1*: rs4781678,  
157 rs2242549, rs881803, rs2075512, and the haplotype of the four SNPs ‘*NDE1* Tag haplotype’;  
158 *PDE4B*: rs7412571)

159

160 The genotypes for the replication cohort of discordant twins were produced with the same method  
161 and at the same time as those described previously (1, 3, 4), with only two variants analysed (*NDE1*:  
162 rs2242549 and rs1050162) using the gene expression data. The analysis using the GTEx database as  
163 a replication cohort was conducted for all variants studied in the families, except for the *DISC1*  
164 haplotype.

165

166 All genetic variants analysed in this study have been implicated by previously described evidence as  
167 being associated with the aetiology of schizophrenia in this cohort (1-4), with variants in both *DISC1*  
168 and *NDE1* having displayed prior gender dependent effects (1, 3, 12). Therefore, no multiple test  
169 correction has been applied to correct for the multiple testing across variants or gender interaction  
170 models, as they can all be considered hypothesis based. However, since we are screening alternative  
171 phenotypes in a hypothesis free manner, we have applied the measures described in the following  
172 sections in order to further characterise these *a priori* variants.

173

#### 174 *Association between Genome-Wide Expression Levels and Genotypes*

175 For the discovery cohort used to study gene expression, a mixed effect linear regression model was  
176 fitted for each probe and genotype using R (RStudio version 0.99.489) lme4 package (38), after  
177 correcting for gender, age, affection status, and family or twin status effects as a covariate. This  
178 analysis was performed separately but identically for the discovery cohort and the replication twin  
179 cohort. We used the false discovery rate (FDR) method in place of a family-wise error rate (FWER).  
180 FDR is widely applied for microarray analyses because it allows more genes to be extracted for



further exploration, and were performed using the qvalue package in R (39) to estimate the FDRs of  $q \leq 0.05$ . The post hoc power of our small familial discovery cohort to detect gene expression changes was estimated using R package ssize.fdr (40). The GTEx database was mined using its own in-built test procedure, entering in a list of gene IDs to be tested against our SNPs of interest. Data from whole blood was used in order to replicate only those genes identified as significantly altered in their gene expression levels at a cut-off of  $p \leq 0.05$ . When testing for replication probes significant ( $p \leq 0.05$ ) in the discovery cohort prior to application of FDR were studied. See Figure 1 for a flow chart of analysis.

### *MicroRNA Target Prediction and Enrichment Analysis*

A comprehensive list of predicted 3'UTR targets for miR-484 were obtained from the miRWalk database (41), considering only genes predicted by at least six of the 12 programs. Ingenuity Pathway Analysis (QIAGEN Redwood City, [www.qiagen.com/ingenuity](http://www.qiagen.com/ingenuity)) was used to analyse potential enrichment of these genes amongst those significantly altered in their expression levels by *NDEI* SNPs in the discovery and replication cohorts.

### *Medication Data*

Prescription medication data from the 931 affected individuals of the schizophrenia family cohort for the period 1<sup>st</sup> January 1996 to 31<sup>st</sup> December 2005 was obtained from the Finnish National Prescription Register of the National Social Insurance Institution (SII) (42), thus forming the discovery cohort for medication use. In this cohort “medication use” is based on purchases of prescribed psychoactive drugs for which the SII have paid a reimbursement. Data from this register contains information on date of purchase and the dose, stated as the international standard daily defined dose. Thus using this data medication periods were defined according to method 4 proposed by Mantel-Teeuwisse et al, multiplying defined daily dose by a factor of 1.1 and filling 15-day gaps

between medication periods (43). This medication period data was used to determine the probability of cessation of each drug by genotype and converted into a binary variable using three months as a cut-off. This three months cut-off reflects that an individual either purchased more of the same medication, or purchased a different medication within a three month period after the original purchase date. Only psychoactive medications with at least 15 instances of use for three months or less were taken for association analysis of the individual drugs, meaning that, of the possible 101 psychoactive drugs for which data was available, only 24 were analysed. When data from multiple drugs were combined in order to study classes of medication, all medications for which data is available were used, regardless of individual frequency. In order to account for the fact that some medication periods may come from the same individual, analysis of the medication usage used logistic regression with GEE-estimation (Generalized Estimating Equations), as utilized by the geepack-package for R (44, 45). Bonferroni correction was used to correct for the multiple tests in the analysis of the individual medications (24 tests) and the groups of medications (five tests). While p-values are presented unadjusted, only those that would surpass the Bonferroni correction based thresholds ( $p \leq 0.0021$  and  $p \leq 0.01$  respectively) are highlighted. See Figure 1 for a flow chart of analysis.

### *Cell Culture and Western Blotting*

To determine whether miR-484 had the potential to affect the expression of selected proteins in a human cell based system, NLF neuroblastoma cells (Children's Hospital of Philadelphia) were grown in RPMI 1640 / 10% foetal calf serum / 2mM L-Glutamine (all from Thermo Fischer Scientific) and transfected with 50nM of either a mimic of mature miR-484 (QIAGEN, Sy-hsa-miR-484) or a negative control microRNA (QIAGEN, AllStars Negative Control microRNA) using Lipofectamine 2000 (Thermo Fischer Scientific) according to manufacturer's instructions. After 48 hours, cells were lysed using PBS / 1% Triton X-100 / 20mM MgCl<sub>2</sub> containing protease inhibitor cocktails and DNaseI.

231 Lysates were Western blotted and proteins detected using the following antibodies: anti- $\alpha$ -actin  
 232 (Sigma, A2066), anti-CYP2C19 (Novus Biologicals, NBP1-19698), anti-CYP2D6 (Abnova,  
 233 H00001565-B01P), anti-NDE1 (ProteinTech, 10233-1-AP), anti-TRIOBP (Sigma, HPA019769) and  
 234 anti- $\alpha$ -tubulin (Sigma, T9026). IRDye secondary antibodies were used (LI-COR) and the signal  
 235 visualized and quantified using an Odyssey CLx infrared imaging system (LI-COR) and associated  
 236 software. All membranes were probed with secondary antibodies alone first to ensure specificity of  
 237 signal. Antibody signals were normalized to actin as a loading control. Mean fold-changes between  
 238 the control and miR-484-treated samples were calculated from 7-8 internal replicates. Three  
 239 independent experiments were performed and the results compared by two-tailed paired Student's t-  
 240 test.

## 241 **Results**

### 242 *Replication of Gene Expression Changes from Previous Studies*

243 In our previous analysis of gene expression in association with DISC1 network variants using publicly  
244 available data on the CEU (Utah residents with North and Western European ancestry) individuals,  
245 86 genes were found to be differentially expressed (30). To verify these results, five of variants were  
246 tested again, this time using the Finnish family cohort. In total, six of the gene expression changes  
247 previously reported could be replicated, for the genes *TRIOBP*, *ZNF500*, *KIAA1468*, *FCER1G*,  
248 *SULT1A1*, and two probes for the *ST3GAL5* gene. These were all in association with the status of the  
249 *NDE1* gene locus (rs2242549).

250

### 251 *Differentially Expressed Genes Associated with DISC1 Pathway Genotype*

252 To further investigate the effect of DISC1 network variants on gene expression, we used this Finnish  
253 family cohort as a discovery sample to investigate the association of previously positive *DISC1* and  
254 *NDE1* variants with genome-wide gene expression of 11,976 probes. Notably, the *NDE1* SNP  
255 rs2242549 was significantly associated with gene expression levels of a large number of the probes  
256 (Tables 1 and S1, Figure S1). Specifically, 3,824 probes representing 3,314 distinct genes showed  
257 uncorrected association with the *NDE1* SNP rs2242549 ( $p \leq 0.05$ ), of which 2,908 probes,  
258 representing 2,542 distinct genes were associated at  $FDR \leq 5\%$ . We also verified that, despite the  
259 size of the discovery cohort, it had sufficient power to detect the differentially expressed genes  
260 associated with the rs2242549 variant (Figure S2). In contrast, no probes were significantly altered  
261 in expression levels in association at  $FDR \leq 5\%$  with either the *DISC1* variants tested (SNP rs821616  
262 of the “HEP3” haplotype comprising rs751229 and rs3738401) or with the other *NDE1* SNPs tested  
263 (rs4781678 or rs1050162).

264

### 265 *Replication of Gene Expression Changes Associated with NDE1 Genotypes*

266 In order to replicate these observations, we pursued three lines of supporting evidence. Firstly, we  
 267 noted that the *NDE1* SNPs rs2242549 and rs1050162 were in high linkage disequilibrium (LD) in the  
 268 full family cohort ( $r^2=0.88$ ,  $n=1891$  individuals genotyped at both loci), and therefore can be assumed  
 269 to act as an internal replication of observations. Thus, within the discovery cohort, of the genes whose  
 270 expression levels were associated with rs2242549, 752 probes representing 695 genes were also  
 271 significantly associated with rs1050162 ( $p \leq 0.05$ ). Secondly, we utilized existing data from a twin  
 272 cohort for schizophrenia from Finland (33, 37) as a replication cohort, identifying 56 probes, each  
 273 representing a different gene, with replicable significant alteration in their expression levels  
 274 associated with rs2242549 (Tables 1 and S1). Finally, we used the publicly available database GTEx  
 275 as an additional independent replication cohort, from which we were able to directly test 2,651 of the  
 276 3,314 genes identified (those probes with an official gene name), confirming that 180 genes also  
 277 display significant gene expression changes related to the *NDE1* SNP rs2242549 in this database  
 278 (Tables 1 and S1).

279

280 In total, 794 probes representing 719 genes had supporting evidence from at least one additional  
 281 source for their changes in expression related to the *NDE1* variant rs2242549, of which 76 probes  
 282 from 73 genes had supporting evidence from more than one source, and 4 probes from independent  
 283 genes (*ITGB5*, *OVGP1*, *PGRMC1*, *TST*) had supporting evidence from all three sources, that is SNPs  
 284 in high LD in the discovery cohort, as well as independent replication cohorts of Finnish twins and  
 285 the GTEx database.

286

## 287 *Enrichment of miR-484 Target Genes Amongst Genes Whose Expression is Associated with NDE1* 288 *Genotype*

289 The finding that expression levels of such a large number of genes could be altered by a single genetic  
 290 locus was surprising, especially given that the principal functions of the NDE1 protein are not known

to be in gene regulation. The *NDE1* locus also encodes for a microRNA (miR-484), which is located on a non-coding 5' exon of the longest splice variant of the *NDE1* gene. Since the major function of microRNAs is in the regulation of expression of other genes it is the most likely explanation for the sheer number of expression changes observed to associate with these SNPs. We therefore investigated whether the set of genes whose expression is altered by these *NDE1* SNPs overlapped with those genes predicted to be targets of miR-484.

Using the miRWalk database (41), 16,027 gene targets are predicted for miR-484, of which 2,588 are predicted by at least six or more of the 12 independent prediction programs used in the database (data collated June 2016). Upon examining the list of genes whose expression is altered by SNPs in the *NDE1* locus at  $FDR \leq 5\%$  in our discovery cohort, these probes were indeed seen to be enriched for predicted targets of miR-484 ( $p=3 \times 10^{-8}$ ). Employing the same tests to the three replication studies described above, the enrichment in miR-484 targets was also present for the set of these genes whose expression level is significantly associated with the genotype of both *NDE1* SNPs rs2242549 and rs1050162 (which were in high LD), and amongst those genes which could also be observed in the replication twin cohort. In contrast, they were not enriched amongst those genes replicated by data from the GTEx database (Table 1).

### *Medication Cessation Associated with NDE1 Genotype*

In our previously published analysis we found *NDE1* genotypes that significantly associated with early cessation of particular medications relevant to mental health (30). We therefore tested whether *NDE1* genotypes were also associated with session of specific medications in a discovery cohort consisting of all affected individuals from the Finnish family cohort. Screening all of the medications frequently used within this discovery cohort, we observed an association between *NDE1* rs4781678 genotype and early cessation of use of the antipsychotic levomepromazine (OR=4.13 per C allele;

95%CI=1.72-9.91;  $p=0.00090$ ). When analysed in interaction with gender, association was further observed across *NDEI* genotypes with early cessation of the use of diazepam and citalopram (Table S2), two drugs that share a common principal metabolizing enzyme, CYP2C19 (Cytochrome P450 2C19, Table S3) (46-49). We therefore asked whether *NDEI* genotype was associated with the subset of medications metabolized by the CYP2C19 enzyme. Since four out of seven of the drugs metabolized by CYP2C19 were selective serotonin reuptake inhibitors (SSRIs), we studied these as a separate group as well as further separated based on CYP2C19 metabolism. No significant interaction was observed for the grouping of all drugs metabolized by CYP2C19, however, a genotype by gender interaction was noted when all SSRIs were grouped together (rs2075512, OR=0.37; 95%CI=0.17-0.79;  $p=0.010$ ). When all SSRIs metabolized by CYP2C19 were tested, this genotype by gender interaction became significant (ranging from: OR=0.27 to 0.31; 95%CI=0.11 to 0.13–0.64 to 0.71;  $p=0.0030$  to 0.0060) for four out of the five *NDEI* markers tested, while no interaction was noted for SSRIs not metabolized by CYP2C19 (Table 2 and Figure S3). We analysed the remaining drugs metabolized by CYP2C19 together as another grouping (“non-SSRIs metabolized by CYP2C19”). Interestingly, a significant interaction was observed (ranging from: OR=3.33 to 5.82; 95%CI=1.44 to 2.25–7.25 to 15.0;  $p=0.0013$  to 0.00030) for all five *NDEI* markers (Table 2 and Figure S3). In this case, however, the gender effect is reversed, with SNPs being associated with cessation among females, in contrast to SSRIs metabolized by CYP2C19, for which SNPs were associated with cessation among males.

### *The Effect of miR-484 on CYP2C19 in Cultured Cells*

Given that a major effect of the *NDEI* locus variants examined here seems to be to alter the expression of genes targeted by miR-484, presumably due to altered expression of this miR-484, we hypothesized that the pharmacological consequences of these variants were also likely to occur through miR-484. For this to be the case, miR-484 would need to affect the levels of CYP2C19 protein expression, and thus be able to alter its metabolic activity effects on psychoactive medication.

342

343 We therefore conducted a proof of principle experiment in NLF human neuroblastoma cells, into  
344 which we transfected a mimic of the mature form of human miR-484. Protein levels of CYP2C19  
345 were significantly up-regulated following miR-484 transfection, when compared to transfection with  
346 a negative control microRNA (Figure 2). In contrast, no effect on the expression of another principal  
347 metabolizing enzyme of psychoactive medications, CYP2D6, was seen, indicating that this is a  
348 specific effect.

349

350 Finally, we also used the same system to investigate two proteins, each of which illustrates a potential  
351 false negative in this study, possibly as a result of power limitations. The first of these, *TRIOBP* was  
352 observed to be significant in our discovery cohort but not in the replication cohorts, while the other  
353 is *NDEI* itself, which was highly significant in the larger GTEx database (beta = 0.24; Standard error  
354 = 0.037; t-statistic=6.6; p=2.3x10<sup>-10</sup>), but not originally observed in our discovery cohort. *TRIOBP*  
355 was further selected as it is also an example of the six genes whose expression was associated with  
356 *NDEI* variation both here and in our previous analysis (30). In both cases, proteins levels were subtly,  
357 but statistically significantly altered following treatment with the miR-484 mimic (Figure 2), in  
358 comparison to the negative control microRNA.

359



## Discussion

Here we have demonstrated that variations within the *NDE1* locus, encoding a protein of the DISC1 network of protein interaction partners, can affect both gene expression levels and medication usage of psychoactive drugs used to treat major mental illnesses. Specifically, two SNPs in high LD are associated with replicable expression changes in a large number of genes, and with early cessation of psychoactive medications metabolised by CYP2C19 in a gender dependent manner. We propose that these observations are linked through the involvement of miR-484. This microRNA is encoded for within the 5' untranslated exon of the longest splice variant of *NDE1*, and the one which is most abundantly expressed, at least in cell culture (50). Notably, the list of genes whose expression changes are associated with these *NDE1* locus variants is significantly enriched for predicted targets of the microRNA, while expression of the CYP2C19 protein has been demonstrated *in vitro* to be significantly increased following addition of a mimic for mature human miR-484. The most promising explanation for the observations described here would therefore be that variation at the *NDE1* locus affects gene expression and medication metabolism in large part through effects of the variant on miR-484, and this may even be behind our prior observations at this locus of association to schizophrenia. It is interesting to note that a 1.45-fold increase in miR-484 has previously been reported in the superior temporal gyri of patients with schizophrenia (51).

The 16p13.11 locus, in which the *NDE1* gene is found, is prone to copy number variations (CNVs), with these 16p13.11 CNVs having been repeatedly associated with psychiatric and neurological disorders (19-22, 28). This locus contains multiple genes, however *NDE1* has been considered amongst the most promising candidates to be involved in these disorders due to its known critical role in neurodevelopment (reviewed: 52). Therefore, our observations here, although of specific SNPs at the *NDE1* locus, highlights disruption of miR-484 as a potential functional consequence also of those CNVs. These results partially parallel recent findings that expression of mature miR-484 led to

alterations in neural progenitor proliferation and differentiation, as well as behavioural changes in mice, thus implicating the microRNA in the phenotypes associated with 16p13.11 duplication (29). While *NDE1* over-expression was not seen to have a gross effect on neuronal progenitor proliferation under similar circumstances, given the severe neurological consequences of biallelic disruption of the *NDE1*, but not miR-484, reading frame (24-27), there is still a potential role for *NDE1* in the conditions associated with 16p13.11 duplication. Additionally, relatively mild phenotypic effects would be needed to explain the fact that while associated with schizophrenia risk, most carriers of the CNV do not develop the condition (19-22). Nevertheless, it can be speculated that a consequence of the duplication of this locus would be gene expression levels changes driven by miR-484, as was seen here to be the case with *NDE1* SNP rs2242549.

This study initially sought to replicate our previous work on the effect of *DISC1* network variants on gene expression changes in the general population, using publicly available data on the CEU (Utah residents with North and Western European ancestry) individuals (30). Of these previously identified 86 genes, we were able to replicate the observed changes in expression of six genes, including expression changes of two probes for *ST3GAL5* and a probe for *TRIOBP*, all of which were in association with the *NDE1* SNP rs2242549. When we tested for gene expression alterations across the genome we identified a large number of probes (n=2,908) representing 2,542 genes whose expression levels associated with variants at the *NDE1* locus, specifically with the SNP rs2242549. A large proportion of these (752 out of 3,824 probes, 695 out of 3,314 genes) were significantly altered by another *NDE1* SNP (rs1050162), which is in high LD with rs2242549. Yet replication attempts in independent cohorts, although providing validation for some genes (56 in an independent Finnish schizophrenia cohort and 180 using the GTEx database), did not provide unilateral confirmatory evidence, with the exception of 4 genes (*ITGB5*, *OVGP1*, *PGRMC1*, *TST*) identified across all three datasets tested. This lack of replication, combined with new observations and their

biological relevance through miR-484 to the *NDEI* locus, suggests that, although the variants studied here are common to many populations, their relationship to potential functional mutations at this locus, and their specific biological consequences associated with schizophrenia and gene expression changes may be unique to this Finnish family cohort (53). This population difference may account for the lack of replication of most of the previously observed genes in the CEU population (30), and the lack of enrichment for miR-484 targets in the GTEx database. This is consistent with *DISC1* variation playing a genetically heterogeneous role in the general incidence of schizophrenia, lacking common illness-associated variations which could be detected by genome-wide association studies (15, 16) of global populations, but providing strong evidence for a role in the condition within specific populations and family studies (53).

420

Another potential explanation for our inability to replicate our observations across cohorts is the fact that our power to detect these effects is reduced due to the small sample sizes used here. Although we have demonstrated that we have 80% power in our discovery cohort to detect large changes in gene expression ( $\Delta = 0.52$ ), this is for our observed 90<sup>th</sup> percentile of the standard deviation for all genes from our data ( $\sigma = 0.53$ ) (Figure S2), probes with smaller standard deviations would not be detectable, either for these probes in replication cohorts or for other probes in the discovery cohort. Thus, we verified our observations in a neuroblastoma cell culture model for two genes that provided inconsistent observations. The first, *TRIOBP*, was observed in our previously published study of the publicly available data on the CEU (Utah residents with North and Western European ancestry) individuals (30) and was replicated in our discovery family cohort, but not in either the twin or GTEx replication cohorts. In contrast, the second, *NDEI*, was not observed in any of the Finnish cohorts but was strongly implicated in the larger GTEx data where *NDEI* expression levels were strongly associated with the *NDEI* SNP rs2242549 genotype (beta = 0.24; Standard error = 0.037; t-statistic=6.6;  $p=2.3 \times 10^{-10}$ ). The proteins encoded for by these genes were each found to be

435 significantly increased by the presence of the mimic miR-484. Such a verification analysis would be  
436 required for all genes implicated in this study. However, with such a large number of genes identified  
437 this was not feasible with the cell culture model used here.

438

439 When the DISC1 network was studied with respect to treatment, the *NDEI* locus again demonstrated  
440 association, specifically in interaction with gender for drugs metabolized by CYP2C19. The degree  
441 of expression of cytochrome P450 enzymes in lymphocytes was too low to allow us to investigate  
442 potential changes in expression level in our family data. Instead we demonstrated in a cell culture  
443 model that miR-484 is capable of increasing the expression of CYP2C19, but not that of another  
444 major metabolizing enzyme for psychoactive drugs, CYP2D6. This suggests that the mechanism  
445 through which the locus confers risk and alters medication usage is the same. In the case of medication  
446 use, we employed a dichotomous variable based on a cut-off of ceasing to use the prescribed  
447 medication after three months or less. This was designed to indicate that a treatment was either not  
448 considered to be working or else was having side effects which were too severe and its use was  
449 therefore stopped. Since the cell culture experiment showed that CYP2C19 protein expression is  
450 increased by miR-484, it can be hypothesized that the medications are more rapidly metabolized in  
451 individuals carrying these variants, leading to a reduced efficacy of those treatments. Interestingly,  
452 the genetic effects on medication differ depending on both class of drug and gender. Males carrying  
453 the risk alleles had a higher probability of cessation of use for SSRIs metabolized by CYP2C19, while  
454 females carrying the risk alleles had an increased probability of cessation for non-SSRI drugs that are  
455 metabolized by CYP2C19. Although the mechanism for these effects remains unclear at this time, it  
456 is noteworthy that the original association between the *NDEI* locus and schizophrenia in these  
457 families was significant only in females (3). Taken together this implies that one or more gender-  
458 specific effects act as modifying factors in conjunction with the *NDEI*/miR-484 locus, although this  
459 cannot be easily modelled in our cell culture system.

460

461 Here, through the identification of altered gene expression patterns that led to the functional  
 462 implication of miR-484, which is coded on an untranslated exon of *NDE1*, we identified a means by  
 463 which genetic variation in the DISC1 network can not only increase risk to major mental illnesses,  
 464 but also how those same variants can alter treatment response to specific psychoactive medications  
 465 through the regulation of their metabolizing enzyme. This study has therefore provided new  
 466 biological insight into psychiatric disorders to which novel medications could be designed, as well as  
 467 suggesting that knowledge of an individual's genotype within the *NDE1*/miR-484 locus may have  
 468 potential value in the targeting of current therapies.

## 469 **Ethics**

470 In all studies, the principles recommended in the Declaration of Helsinki, and its amendments were  
471 followed. The study has been approved by the Coordinating Ethics committee of the Hospital District  
472 of Helsinki and Uusimaa. Informed consent was obtained from all participants.

473

## 474 **Competing interests**

475 We have no competing interests.

476

## 477 **Author Contributions**

478 NJB, LUV and WH wrote the manuscript text; NJB, MP, LUV, and WH prepared the manuscript  
479 figures; NJB, JS, JL, JH and WH designed the study; ST, TP, JS, JL, TDC and JH provided access to  
480 samples and data; NJB performed laboratory experiments; NJB, LUV, MP, ABZ, AOA, MTH, VS  
481 and WH performed the analysis; all authors reviewed the manuscript and approved the final version  
482 to be published.

483

## 484 **Acknowledgements**

485 Gene-expression analysis was performed by the Institute for Molecular Medicine Finland FIMM  
486 Technology Centre, University of Helsinki. Jaakko Kaprio is gratefully acknowledged for the  
487 provision of control twins to this study and for critical reading of the manuscript. Antti Tanskanen of  
488 the National Institute for Health and Welfare is thanked for producing the definitions of the  
489 medications periods used in this study.

490

## 491 **Funding**

492 This work has been supported by the Academy of Finland (grant numbers: 128504, 259589, 265097  
493 to WH), EU-FP7 (MC-ITN number 607616 “IN-SENS” to WH), the Orion Farnos Research

494 Foundation (to WH), the Forschungskommission of the Heinrich Heine University Medical Faculty  
495 (grant number: 9772547 to NJB), the Fritz Thyssen Foundation (grant number: 10.14.2.140 to NJB),  
496 and the Alexander von Humboldt Foundation (fellowship number: 1142747 to NJB).

# References

1. Hennah W, Varilo T, Kestilä M, Paunio T, Arajärvi R, Haukka J, et al. Haplotype transmission analysis provides evidence of association for DISC1 to schizophrenia and suggests sex-dependent effects. *Hum Mol Genet.* 2003;12:3151-9.
2. Ekelund J, Hennah W, Hiekkalinna T, Parker A, Meyer J, Lönnqvist J, et al. Replication of 1q42 linkage in Finnish schizophrenia pedigrees. *Mol Psychiatry.* 2004;9:1037-41.
3. Hennah W, Tomppo L, Hiekkalinna T, Palo OM, Kilpinen H, Ekelund J, et al. Families with the risk allele of DISC1 reveal a link between schizophrenia and another component of the same molecular pathway, NDE1. *Hum Mol Genet.* 2007;6(5):453-62.
4. Tomppo L, Hennah W, Lahermo P, Loukola A, Tuulio-Henriksson A, Suvisaari J, et al. Association between genes of Disrupted in Schizophrenia 1 (DISC1) interactors and schizophrenia supports the role of the DISC1 pathway in the etiology of major mental illnesses. *Biol Psychiatry.* 2009;65(12):1055-62.
5. Millar JK, Christie S, Porteous DJ. Yeast two-hybrid screens implicate DISC1 in brain development and function. *Biochem Biophys Res Comm.* 2003;311:1019-25.
6. Morris JA, Kandpal G, Ma L, Austin CP. DISC1 (Disrupted-In-Schizophrenia 1) is a centrosome-associated protein that interacts with MAP1A, MIPT3, ATF4/5 and NUDEL: regulation and loss of interaction with mutation. *Hum Mol Genet.* 2003;12(13):1591-608.
7. Ozeki Y, Tomoda T, Kleiderlein J, Kamiya A, Bord L, Fujii K, et al. Disrupted-in-Schizophrenia-1 (DISC-1): Mutant truncation prevents binding to NudE-like (NUDEL) and inhibits neurite outgrowth. *Proc Natl Acad Sci USA.* 2003;100(1):289-94.
8. Millar JK, Pickard BS, Mackie S, James R, Christie S, Buchanan SR, et al. DISC1 and PDE4B are interacting genetic factors in schizophrenia that regulate cAMP signalling. *Science.* 2005;310:1187-91.



- 521 9. Palo OM, Antila M, Silander K, Hennah W, Kilpinen H, Soronen P, et al. Association of  
522 distinct allelic haplotypes of *DISC1* with psychotic and bipolar spectrum disorders and with  
523 underlying cognitive impairments. *Hum Mol Genet.* 2007;16:2517-28.
- 524 10. Hennah W, Thomson P, McQuillin A, Bass N, Loukola A, Anjorin A, et al. *DISC1*  
525 association, heterogeneity and interplay in schizophrenia and bipolar disorder. *Mol Psychiatry.*  
526 2009;14:865-73.
- 527 11. Kilpinen H, Ylisaukko-oja T, Hennah W, Palo OM, Varilo T, Vanhala R, et al. Association  
528 of *DISC1* with autism and Asperger syndrome. *Mol Psychiatry.* 2008;13:187-96.
- 529 12. Hennah W, Tuulio-Henriksson A, Paunio T, Ekelund J, Varilo T, Partonen T, et al. A  
530 haplotype within the *DISC1* gene is associated with visual memory functions in families with a high  
531 density of schizophrenia. *Mol Psychiatry.* 2005;10:1097-103.
- 532 13. Cannon TD, Hennah W, van Erp TGM, Thompson PM, Lonnqvist J, Huttunen M, et al.  
533 Association of *DISC1/TRAX* haplotypes with schizophrenia, reduced prefrontal gray matter, and  
534 impaired short- and long-term memory. *Arch Gen Psychiatry.* 2005;62:1205-13.
- 535 14. Wegelius A, Pankakoski M, Tomppa L, Lehto U, Lönqvist J, Suvisaari J, et al. An  
536 interaction between *NDE1* and high birth weight increases schizophrenia susceptibility. *Psychiatry*  
537 *Res.* 2015;230:194-9.
- 538 15. Sullivan PF. Questions about *DISC1* as a genetic risk factor for schizophrenia. *Mol*  
539 *Psychiatry.* 2013;18:1050-2.
- 540 16. Schizophrenia Working Group of the Psychiatric Genomics Consortium. Biological insights  
541 from 108 schizophrenia-associated genetic loci. *Nature.* 2014;511(7510):421-7.
- 542 17. Millar JK, Wilson-Annan JC, Anderson S, Christie S, Taylor MS, Semple CAM, et al.  
543 Disruption of two novel genes by a translocation co-segregating with schizophrenia. *Hum Mol*  
544 *Genet.* 2000;9(9):1415-25.

- 545 18. Thomson PA, Duff B, Blackwood DHR, Romaniuk L, Watson A, Whalley HC, et al.  
546 Balanced translocation linked to psychiatric disorder, glutamate, and cortical structure/function.  
547 NPJ Schizophr. 2016;2:16024.
- 548 19. Sahoo T, Theisen A, Rosenfeld JA, Lamb AN, Ravnan JB, Schultz RA, et al. Copy number  
549 variants of schizophrenia susceptibility loci are associated with a spectrum of speech and  
550 developmental delays and behavior problems. Genet Med. 2011;13(10):868-80.
- 551 20. Malhotra D, Sebat J. CNVs: Harbingers of a rare variant revolution in psychiatric genetics.  
552 Cell. 2012;148(6):1223-41.
- 553 21. Rees E, Walters JTR, Georgieva L, Isles AR, Chambert KD, Richards AL, et al. Analysis of  
554 copy number variations at 15 schizophrenia-associated loci. Br J Psychiatry. 2014;204(2):108-14.
- 555 22. Rodriguez-Lopez J, Carrera N, Arrojo M, Amigo J, Sobrino B, Páramo M, et al. An efficient  
556 screening method for simultaneous detection of recurrent copy number variants associated with  
557 psychiatric disorders. Clin Chim Acta. 2015;445:34-40.
- 558 23. Kimura H, Tsuboi D, Wang C, Kushima I, Koide T, Ikeda M, et al. Identification of rare,  
559 single-nucleotide mutations in *NDE1* and their contributions to schizophrenia susceptibility.  
560 Schizophr Bull. 2014;41(3):744-53.
- 561 24. Alkuraya FS, Cai X, Emery C, Mochida Ganeshwaran H, Al-Dosari Mohammed S, Felie  
562 Jillian M, et al. Human mutations in *NDE1* cause extreme microcephaly with lissencephaly. Am J  
563 Hum Genet. 2011;88:536-47.
- 564 25. Bakircioglu M, Carvalho OP, Khurshid M, Cox JJ, Tuysuz B, Barak T, et al. The essential  
565 role of centrosomal *NDE1* in human cerebral cortex neurogenesis. Am J Hum Genet. 2011;88:523-  
566 35.
- 567 26. Guven A, Gunduz A, Bozoglu T, Yalcinkaya C, Tolun A. Novel *NDE1* homozygous  
568 mutation resulting in microhydranencephaly and not microlyssencephaly. Neurogenetics.  
569 2012;13(3):189-94.

- 570 27. Paciorowski AR, Keppler-Noreuil K, Robinson L, Sullivan C, Sajan S, Christian SL, et al.  
571 Deletion 16p13.11 uncovers *NDE1* mutations on the non-deleted homolog and extends the spectrum  
572 of severe microcephaly to include fetal brain disruption. *Am J Med Genet.* 2013;161A(7):1523-30.
- 573 28. de Kovel CGF, Trucks H, Helbig I, Mefford HC, Baker C, Leu C, et al. Recurrent  
574 microdeletions at 15q11.2 and 16p13.11 predispose to idiopathic generalized epilepsies. *Brain.*  
575 2010;133(1):23-32.
- 576 29. Fujitani M, Zhang S, Fujiki R, Fujihara Y, Yamashita T. A chromosome 16p13.11  
577 microduplication causes hyperactivity through dysregulation of miR-484/protocadherin-19  
578 signaling. *Mol Psychiatry.* 2016;doi:10.1038/mp.2016.106.
- 579 30. Hennah W, Porteous D. The DISC1 pathway modulates expression of neurodevelopmental,  
580 synaptogenic and sensory perception genes. *PLoS One.* 2009;4:e4906.
- 581 31. Hovatta I, Lichtermann D, Juvonen H, Suvisaari J, Terwilliger JD, Arajärvi R, et al. Linkage  
582 analysis of putative schizophrenia gene candidate regions on chromosomes 3p, 5q, 6p, 8p, 20p and  
583 22q in a population-based sampled Finnish family set. *Mol Psychiatry.* 1998;3:452-7.
- 584 32. American Psychiatric Association. Diagnostic and Statistical Manual of Mental Disorders, 4th  
585 Edition. Washington, DC: American Psychiatric Press; 1994.
- 586 33. Orešič M, Seppänen-Laakso T, Sun D, Tang J, Therman S, Viehman R, et al. Phospholipids  
587 and insulin resistance in psychosis: a lipidomics study of twin pairs discordant for schizophrenia.  
588 *Genome Med.* 2012;4:1.
- 589 34. GTEx Consortium. The Genotype-Tissue Expression (GTEx) pilot analysis: multitissue  
590 gene regulation in humans. *Science.* 2015;348:648-60.
- 591 35. Wedenoja J, Loukola A, Tuulio-Henriksson A, Paunio T, Ekelund J, Silander K, et al.  
592 Replication of linkage on chromosome 7q22 and association of the regional *Reelin* gene with  
593 working memory in schizophrenia families. *Mol Psychiatry.* 2008;13:673-84.

594 36. Stoll G, Pietilainen OPH, Linder B, Suvisaari J, Brosi C, Hennah W, et al. Deletion of TOP3  
595  $\beta$ , a component of FMRP-containing mRNPs, contributes to neurodevelopmental disorders. Nat  
596 Neurosci. 2013;16(9):1228-37.

597 37. Zheutlin AB, Viehman RW, Fortgang R, Borg J, Smith DJ, Suvisaari J, et al. Cognitive  
598 endophenotypes inform genome-wide expression profiling in schizophrenia. . Neuropsychology.  
599 2016;30:40-52.

600 38. Bates D, Mächler M, Bolker BM, Walker SC. Fitting linear mixed-effects models using  
601 lme4. J Stat Softw. 2015;67:1-48.

602 39. Storey JD, Tibshirani R. Statistical significance for genomewide studies. Proc Natl Acad Sci  
603 U S A. 2003;100(16):9440-5.

604 40. Liu P, Hwang JT. Quick calculation for sample size while controlling false discovery rate  
605 with application to microarray analysis. Bioinformatics. 2007;23(6):739-46.

606 41. Dweep H, Gretz N. miRWalk2.0: a comprehensive atlas of microRNA-target interactions.  
607 Nat Meth. 2015;12:697.

608 42. Haukka J, Suvisaari J, Tuulio-Henriksson A, Lönnqvist J. High concordance between self-  
609 reported medication and official prescription database information. Eur J of Clin Pharmacol.  
610 2007;63:1069-74.

611 43. Mantel-Teeuwisse AK, Klungel OH, Verschuren WMM, Porsius A, de Boer A. Comparison  
612 of different methods to estimate prevalence of drug use by using pharmacy records. J Clin  
613 Epidemiol. 2001;54:1181-6.

614 44. Yan J, Fine J. Estimating equations for association structures. Statist Med. 2004;23:859-74.

615 45. R Core Team. R: A Language and Environment for Statistical Computing. Vienna, Austria:  
616 R Foundation for Statistical Computing; 2015.

617 46. Whirl-Carrillo M, McDonagh EM, Hebert JM, Gong L, Sangkuhl K, Thorn CF, et al.  
618 Pharmacogenomics knowledge for personalized medicine. Clin Pharmacol Ther. 2012;92:414-7.

- 619 47. Law V, Knox C, Djoumbou Y, Jewison T, Guo AC, Liu Y, et al. DrugBank 4.0: shedding  
620 new light on drug metabolism. Nucl Acids Res. 2014;42:D1091-7.
- 621 48. Hicks JK, Bishop JR, Sangkuhl K, Müller DJ, Ji Y, Leckband SG, et al. Clinical  
622 Pharmacogenetics Implementation Consortium (CPIC) guideline for *CYP2D6* and *CYP2C19*  
623 genotypes and dosing of selective serotonin reuptake inhibitors. Clin Pharmacol Ther. 2015;98:127-  
624 34.
- 625 49. Kanehisa M, Furumichi M, Tanabe M, Sato Y, Morishima K. KEGG: new perspectives on  
626 genomes, pathways, diseases and drugs. Nucl Acids Res. 2017;45:D353-D61.
- 627 50. Bradshaw NJ. Cloning of the promoter of *NDE1*, a gene implicated in psychiatric and  
628 neurodevelopmental disorders through copy number variation. Neuroscience. 2016;324:262-70.
- 629 51. Beveridge NJ, Gardiner E, Carroll AP, Tooney PA, Cairns MJ. Schizophrenia is associated  
630 with an increase in cortical microRNA biogenesis. Mol Psychiatry. 2010;15:1176-89.
- 631 52. Bradshaw NJ, Hayashi MAF. NDE1 and NDEL1 from genes to (mal)functions: Parallel but  
632 distinct roles impacting on neurodevelopmental disorders and psychiatric illness. Cell Mol Life Sci.  
633 2017;74:1191-210.
- 634 53. Porteous DJ, Thomson PA, Millar JK, Evans KL, Hennah W, Soares DC, et al. DISC1 as a  
635 genetic risk factor for schizophrenia and related major mental illness: response to Sullivan. Mol  
636 Psychiatry. 2014;19(2):141-3.

637

**Table 1: Number of probes and genes significantly altered by variants in the DISC1 network, how they replicate across different cohorts, and how they overlap with the predicted targets of miR-484.** \* Targets predicted by at least 6 out of 12 prediction tools summarised by miRWalk were uploaded to Ingenuity Pathway Analysis (IPA), thus enabling a test for enrichment when the subsequent probe/gene lists were studied. na = value was not applicable as it was not tested, ns = value was not significant nor returned by IPA.

|                                                    |                | Observations     |                       |              |                      | Gene Replications    |                       |                      |                      |
|----------------------------------------------------|----------------|------------------|-----------------------|--------------|----------------------|----------------------|-----------------------|----------------------|----------------------|
|                                                    |                | Discovery Cohort |                       |              |                      | Discovery Cohort     | a priori Observations | Replication Cohorts  |                      |
| Gene                                               | Variant        | Probe p≤0.05     | Gene p≤0.05           | Probe q≤0.05 | Gene q≤0.05          | Variants in High LD  | Hennah & Porteous(30) | Finnish SCZ Twins    | GTEEx (Whole Blood)  |
| <i>DISC1</i>                                       | Haplotype HEP3 | 432              | 419                   | 0            | 0                    | na                   | na                    | na                   | na                   |
|                                                    | rs821616       | 1332             | 1265                  | 0            | 0                    | na                   | 1                     | na                   | 49                   |
| <i>NDE1</i>                                        | rs4781678      | 340              | 327                   | 0            | 0                    | na                   | 1                     | na                   | 18                   |
|                                                    | rs2242549      | 3824             | 3314                  | 2908         | 2542                 | 715                  | 7 (6 genes)           | 56                   | 180                  |
|                                                    | rs1050162      | 1071             | 985                   | 0            | 0                    | 715                  | na                    | 13                   | 60                   |
| Enrichment for predicted targets of mircoRNA-484 * |                |                  |                       |              |                      |                      |                       |                      |                      |
|                                                    | rs2242549      |                  | 2.2×10 <sup>-13</sup> |              | 3.0×10 <sup>-8</sup> | 1.2×10 <sup>-3</sup> |                       | 1.4×10 <sup>-3</sup> | 5.5×10 <sup>-2</sup> |
|                                                    | rs1050162      |                  | 5.6×10 <sup>-4</sup>  |              |                      | 1.2×10 <sup>-3</sup> |                       | ns                   | 1.5×10 <sup>-1</sup> |

**Table 2: Results for the association of *NDE1* variants with groups of medications based on their metabolism by the CYP2C19 enzyme and/or Selective Serotonin Reuptake Inhibitor (SSRI) class status, showing the p-values and odds ratios (and 95% confidence intervals) for the interaction model. P-values  $\leq 0.01$  are below the Bonferroni correction threshold for the five groups tested. P-values and their respective ORs that are below the Bonferroni threshold are in bold. Medications included in each group analysis can be found in Figure S3 and Table S3.**

| <i>NDE1</i> Variant                                                                 | SNP<br>p-value | SNP*Gender<br>p-value | OR (95% CI)                |
|-------------------------------------------------------------------------------------|----------------|-----------------------|----------------------------|
| All psychoactive drugs metabolised by CYP2C19 (N=510-581, no of instances: 843-945) |                |                       |                            |
| rs4781678                                                                           | 0.79           | 0.90                  | 0.97 (0.55 - 1.69)         |
| rs2242549                                                                           | 0.56           | 0.74                  | 1.10 (0.64 - 1.86)         |
| rs881803                                                                            | 0.29           | 0.15                  | 1.53 (0.86 - 2.73)         |
| rs2075512                                                                           | 0.64           | 0.79                  | 0.93 (0.53 - 1.63)         |
| Haplotype                                                                           | 0.35           | 0.73                  | 1.10 (0.63 - 1.93)         |
| SSRIs (N=357-402, no of instances: 496-563)                                         |                |                       |                            |
| rs4781678                                                                           | 0.31           | 0.033                 | 0.43 (0.20 - 0.93)         |
| rs2242549                                                                           | 0.92           | 0.031                 | 0.46 (0.23 - 0.93)         |
| rs881803                                                                            | 0.41           | 0.29                  | 0.67 (0.32 - 1.40)         |
| rs2075512                                                                           | 0.97           | <b>0.010</b>          | <b>0.37 (0.17 - 0.79)</b>  |
| Haplotype                                                                           | 0.87           | 0.029                 | 0.42 (0.19 - 0.91)         |
| SSRIs metabolised by CYP2C19 (N=282-318, no of instances: 357-395)                  |                |                       |                            |
| rs4781678                                                                           | 0.42           | <b>0.003</b>          | <b>0.27 (0.11 - 0.64)</b>  |
| rs2242549                                                                           | 0.47           | <b>0.006</b>          | <b>0.30 (0.13 - 0.70)</b>  |
| rs881803                                                                            | 0.51           | 0.064                 | 0.44 (0.19 - 1.05)         |
| rs2075512                                                                           | 0.39           | <b>0.005</b>          | <b>0.31 (0.13 - 0.70)</b>  |
| Haplotype                                                                           | 0.95           | <b>0.006</b>          | <b>0.30 (0.13 - 0.71)</b>  |
| SSRIs not metabolised by CYP2C19 (N=123-145, no of instances: 142-169)              |                |                       |                            |
| rs4781678                                                                           | 0.48           | 0.71                  | 1.36 (0.27 - 6.87)         |
| rs2242549                                                                           | 0.30           | 0.58                  | 1.37 (0.45 - 4.23)         |
| rs881803                                                                            | 0.58           | 0.23                  | 2.24 (0.60 - 8.38)         |
| rs2075512                                                                           | 0.10           | 0.88                  | 0.88 (0.19 - 4.13)         |
| Haplotype                                                                           | 0.66           | 0.77                  | 1.25 (0.27 - 5.76)         |
| Non-SSRIs metabolised by CYP2C19 (N=318-355, no of instances: 411-459)              |                |                       |                            |
| rs4781678                                                                           | 0.24           | <b>0.0051</b>         | <b>3.33 (1.44 - 7.73)</b>  |
| rs2242549                                                                           | 0.62           | <b>0.0013</b>         | <b>3.42 (1.61 - 7.25)</b>  |
| rs881803                                                                            | 0.63           | <b>0.00030</b>        | <b>5.82 (2.25 - 15.0)</b>  |
| rs2075512                                                                           | 0.92           | <b>0.0064</b>         | <b>3.63 (1.44 - 9.17)</b>  |
| Haplotype                                                                           | 0.22           | <b>0.00030</b>        | <b>4.93 (2.07 - 11.76)</b> |

## Figure Legends

**Figure 1: Schematic flow chart of the analysis undertaken in this study.**

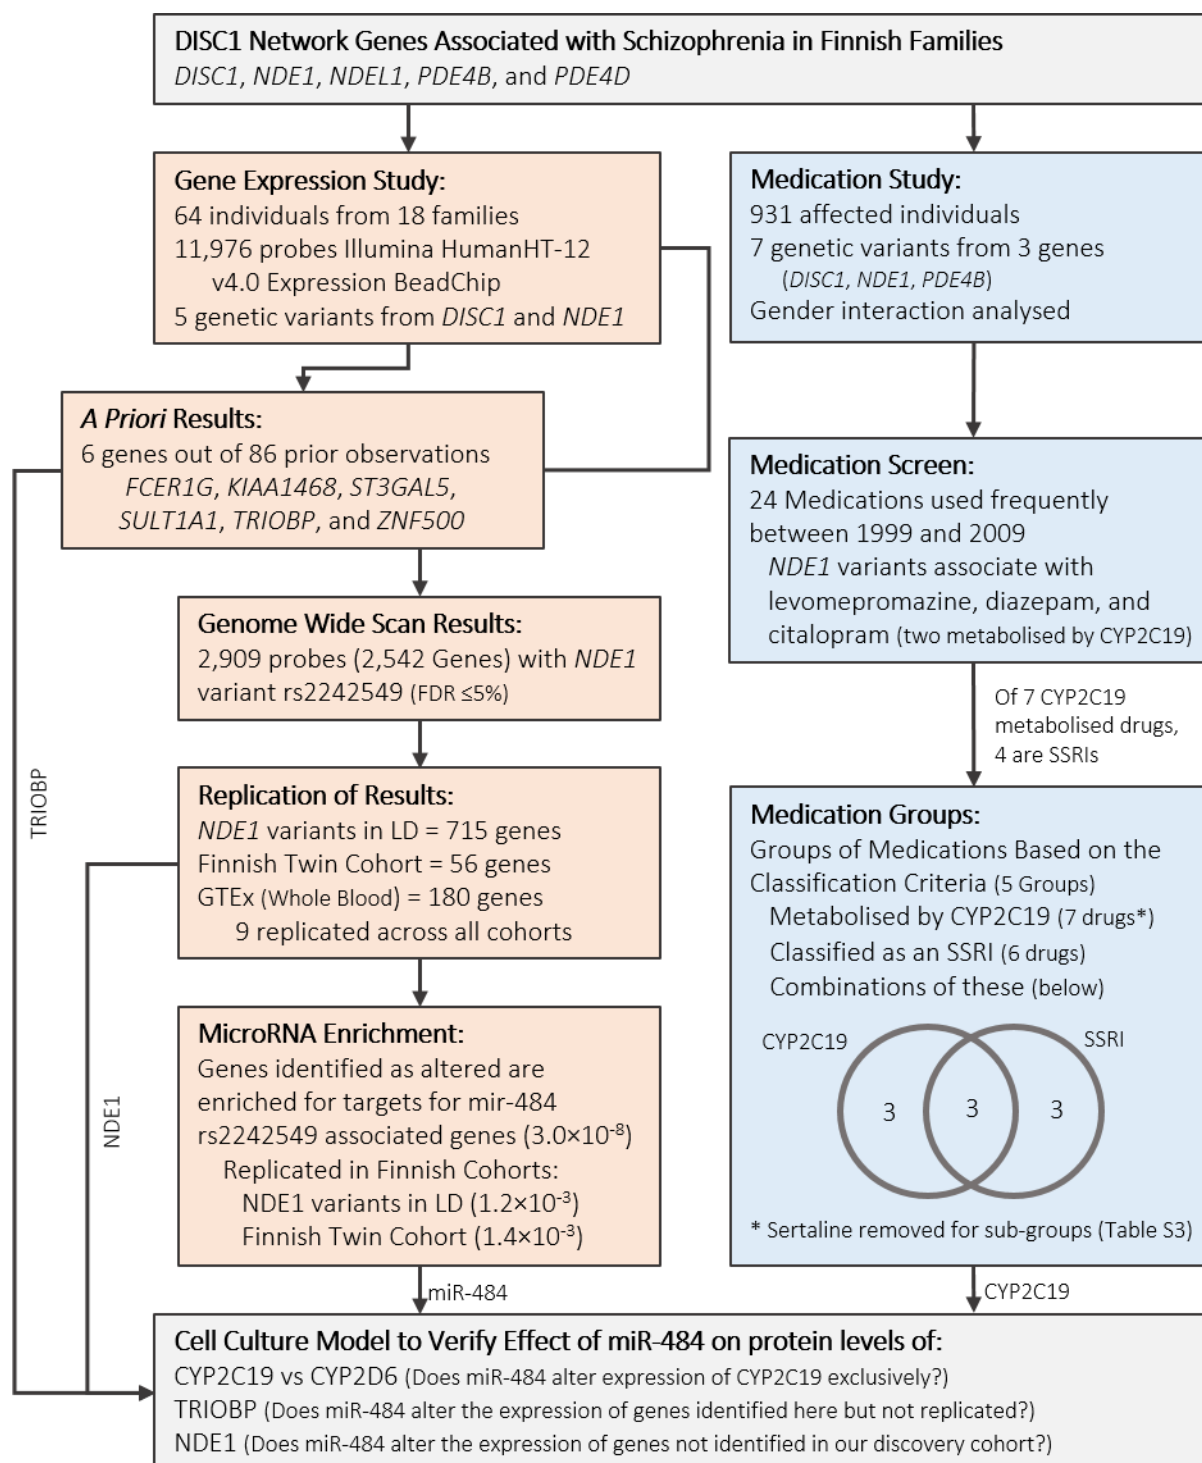



**Figure 2: The effect of a miR-484 mimic on protein expression in human NLF neuroblastoma cells.** a) Sample western blots showing levels of six proteins in the lysates of cells which had been transfected with either a mimic of miR-484 or with a negative control microRNA. b) Quantification of three independent experiments, each comprising 7-8 internal replicates. All proteins were normalized to actin. \*:  $p < 0.05$ , \*\*:  $p < 0.01$ .

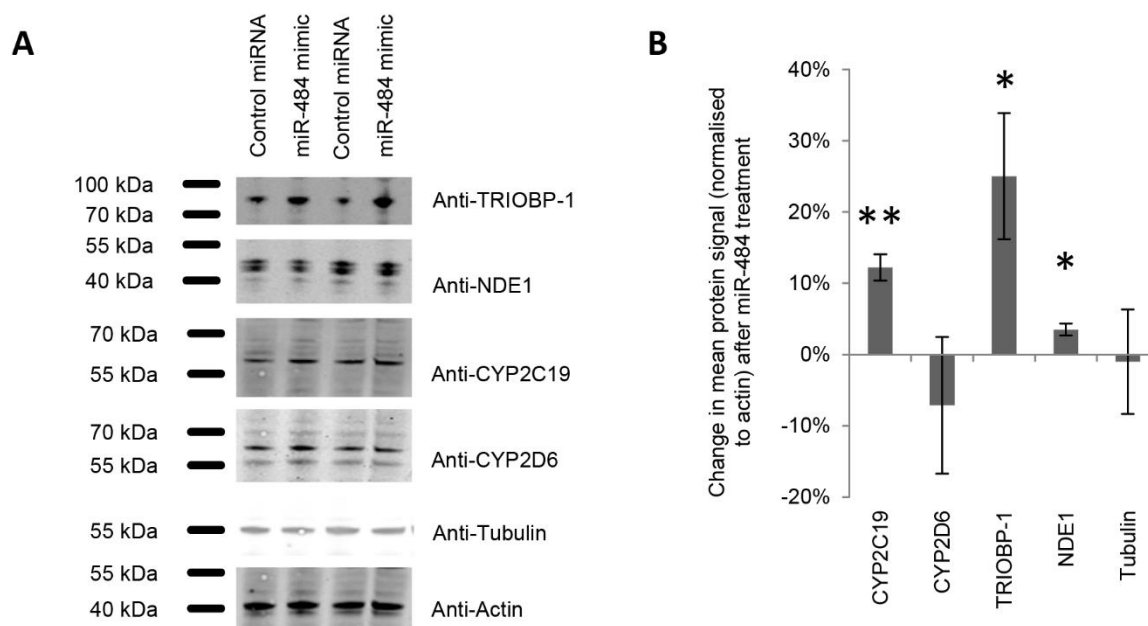

Source: http://biorxiv.org/content/10.1101/087007v2.full.pdf
